# Supplementary material
Source: publisher site journal article supplement (https://www.dovepress.com/article/505559)
Supplement: Supplementary file 1 [file 505559%20Supplementary%20Material.docx]

**Supplementary Material**

**Supplementary Figure S1.** Kaplan-Meier survival curves for 28-day mortality in sepsis patients with ACLF.

**Supplementary Table S1.** Sepsis Characteristics and Organ Failures in the Study Cohort

| Variable | Total (n =246) | Training(n=185) | | Validation(n=61) | *P* value |
| --- | --- | --- | --- | --- | --- |
| **Primary Infection Focus, n (%)** | | | 0.827 | | |
| Pulmonary | 98 (39.8) | 75 (40.5) | | 23 (37.7) |  |
| Intra-abdominal | 74 (30.1) | 55 (29.7) | | 19 (31.1) |  |
| Urinary Tract | 28 (11.4) | 22 (11.9) | | 6 (9.8) |  |
| Bloodstream | 25 (10.2) | 18 (9.7) | | 7 (11.5) |  |
| Soft Tissue | 10 (4.1) | 8 (4.3) | | 2 (3.3) |  |
| Other | 11 (4.5) | 7 (3.8) | | 4 (6.6) |  |
| **Appropriate Initial Antibiotics, n (%)** | | | 0.707 | | |
| No | 68 (27.6) | 50 (27.0) | | 18 (29.5) |  |
| Yes | 178 (72.4) | 135 (73.0) | | 43 (70.5) |  |
| **Organ Failures** |  |  | |  |  |
| RF, n (%) |  |  | |  | 0.136 |
| No | 203 (82.5) | 157 (84.9) | | 46 (75.4) |  |
| Yes | 43 (17.5) | 28 (15.1) | | 15 (24.6) |  |
| HF, n (%) |  |  | |  | 0.326 |
| No | 185 (75.2) | 142 (76.8) | | 43 (70.5) |  |
| Yes | 61 (24.8) | 43 (23.2) | | 18 (29.5) |  |
| ARF, n (%) |  |  | |  | 0.244 |
| No | 223 (90.7) | 170 (91.9) | | 53 (86.9) |  |
| Yes | 23 (9.3) | 15 (8.1) | | 8 (13.1) |  |

HF, heart failure, RF, respiratory failure, ARF, acute renal failure.
